# Supplementary material for: Maltose-binding protein effectively stabilizes the partially closed conformation of the ATP-binding cassette transporter MalFGK2
Source: Royal Society of Chemistry journal article supplement (doi:10.1039/c6cp07943a), 2017-01-01
Supplement: c6cp07943a1.pdf [file c6cp07943a1.pdf]

## **SUPPORTING INFORMATION**

### **Maltose Binding Protein Effectively Stabilizes the Partially Closed Conformation of the ATP-binding Cassette Transporter MalFGK<sub>2</sub>**

Jingwei Weng, Shuo Gu, Xin Gao, Xuhui Huang\*, Wenning Wang\*

## SUPPLEMENTARY FIGURES

**Figure S1:** Residues forming the periplasmic, middle and cytoplasmic gates along translocation pathway at the MalF-MalG interface and the correlation of the inter-residue distance with  $CV^{TMD}$ .

**Figure S2:** Top view of NBD dimer interface and the correlation between  $CV^{NBD}$  and the inter-residue distance S83<sup>A</sup>-S83<sup>B</sup> at the interface.

**Figure S3:** Convergence check of the metadynamics simulations of the **apo** and **complex** systems.

**Figure S4:** The variation of  $C_{\alpha}$  RMSDs along the eight 100-ns trajectories of the **complex**, **apo**, and **MalF500** systems.

**Figure S5:** Comparison of  $C_{\alpha}$  RMSFs calculated by the unbiased **complex** and **apo** trajectories with those derived from the B-factors of the crystal structures.

**Figure S6:** Projections of snapshots from eight 100-ns **complex** and **apo** trajectories initiated from intermediate structure on the 2-D space spanned by  $CV^{NBD}$  and  $CV^{TMD}$ .

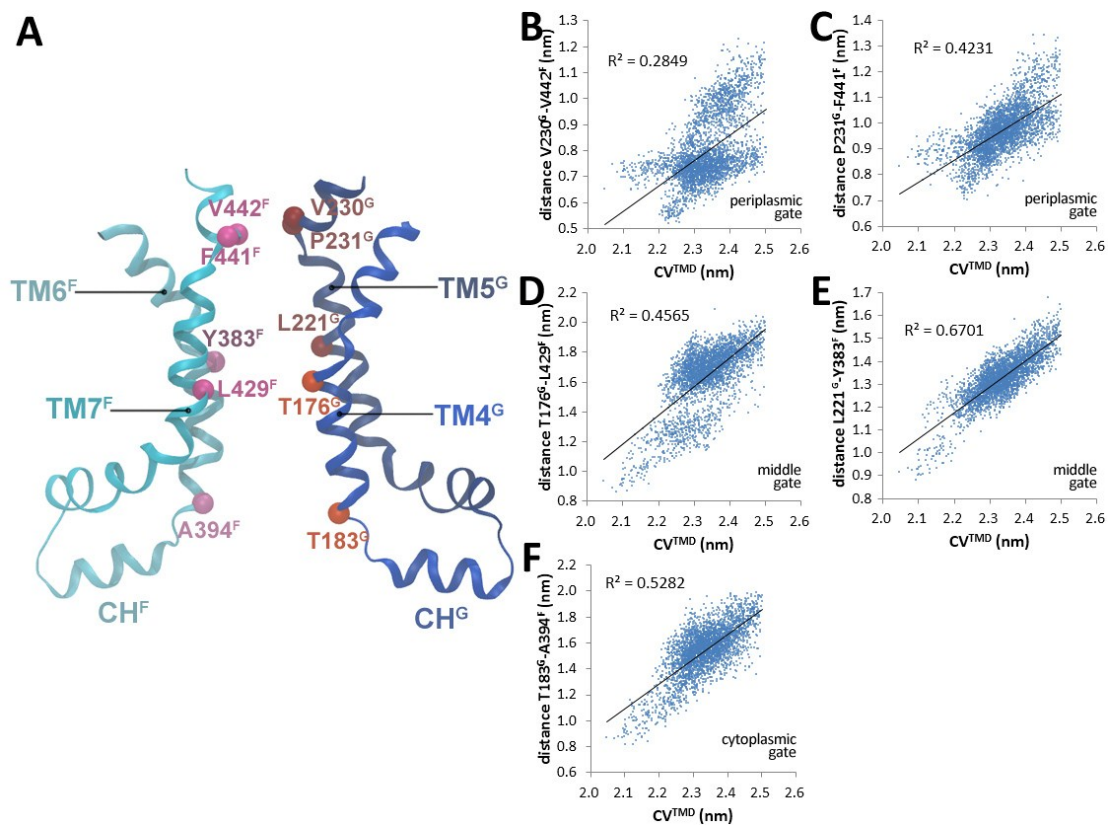

**Figure S1.** (A) The translocation pathway at the MalF-MalG interface. The residues forming the periplasmic, middle and cytoplasmic gates along the pathway are represented by their C<sub>α</sub> atoms as spheres. The correlation of CV<sup>TMD</sup> with the inter-residue distance V230<sup>G</sup>-V442<sup>F</sup> (B) and P231<sup>G</sup>-F441<sup>F</sup> (C) lying at the periplasmic side of TMDs, with the inter-residue distance T176<sup>G</sup>-L429<sup>F</sup> (D) and L221<sup>G</sup>-Y383<sup>F</sup> (E) in the middle of the TMHs, and with the inter-residue distance T183<sup>G</sup>-A394<sup>F</sup> (F) at the cytoplasmic side. Metadynamics simulation trajectory of the **apo** system was projected onto the figures and the correlation coefficients were calculated supposing that all the snapshots share the same population.

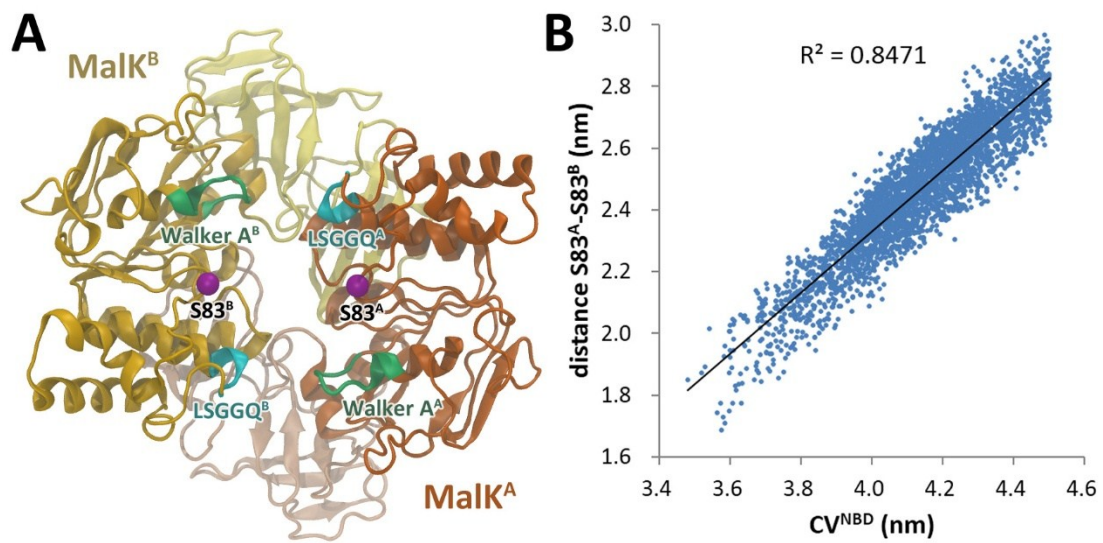

**Figure S2.** (A) NBD dimer interface viewed from the periplasm. The residues are represented by their C<sub>α</sub> atoms as spheres. (B) Correlation between CV<sup>NBD</sup> and the inter-residue distance S83<sup>A</sup>-S83<sup>B</sup> in the metadynamics trajectory of the **apo** system. The correlation coefficient was calculated supposing that all the snapshots share the same population.

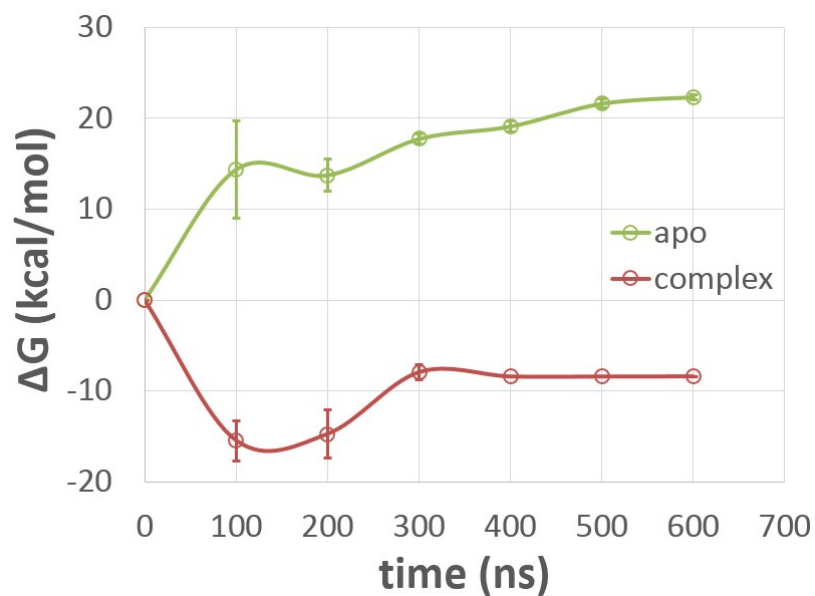

**Figure S3.** Convergence check of the metadynamics simulations of the **apo** and **complex** systems. The free energy differences between the pre-T and resting states on the 2-D space spanned by  $CV^{NBD}$  and  $CV^{TMD}$  are plotted against simulation time. For each point except time 0, the differences are averaged over the data within  $\pm 50$  ns and the standard deviation for each average value is given as error bar.

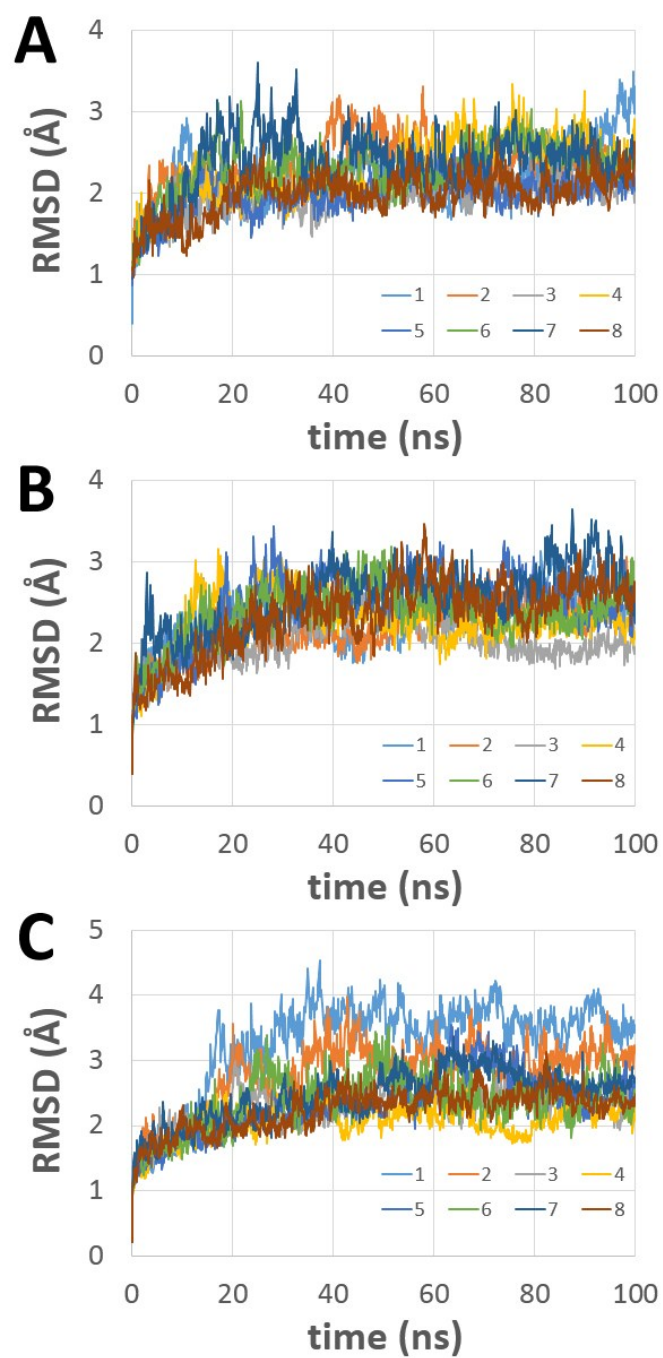

**Figure S4.** The variations of  $C_{\alpha}$  root-mean-square deviations (RMSDs) along the eight 100-ns trajectories of the **complex** (A), **apo** (B), and **MalF500** (C) systems.  $C_{\alpha}$  RMSD is defined relative to the initial structure.

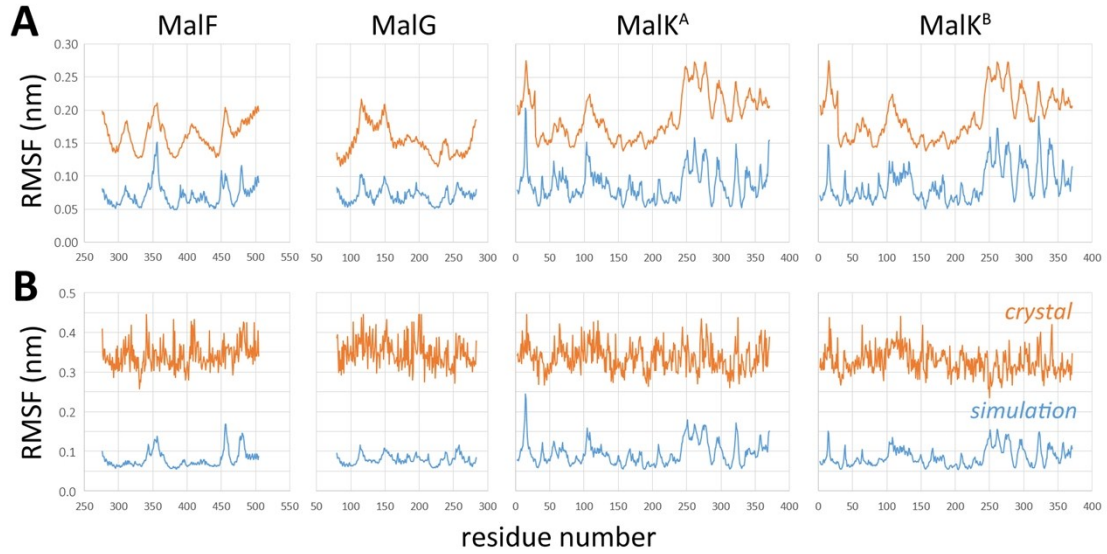

**Figure S5.** Comparison of the C $\alpha$  RMSFs calculated from the unbiased MD simulations of **complex** (A) and **apo** (B) systems with those derived from the B-factors of the crystal structures. The RMSF values were calculated using the last 5 ns of each trajectory and were then averaged over the trajectories. Only the residues on MalFG cores or on MalKs were considered. For ease of comparison, the crystallographic B-factors were transformed into RMSFs according to the equation  $\text{RMSF} = [3 \cdot \text{B-factor} / (8\pi^2)]^{1/2}$ .

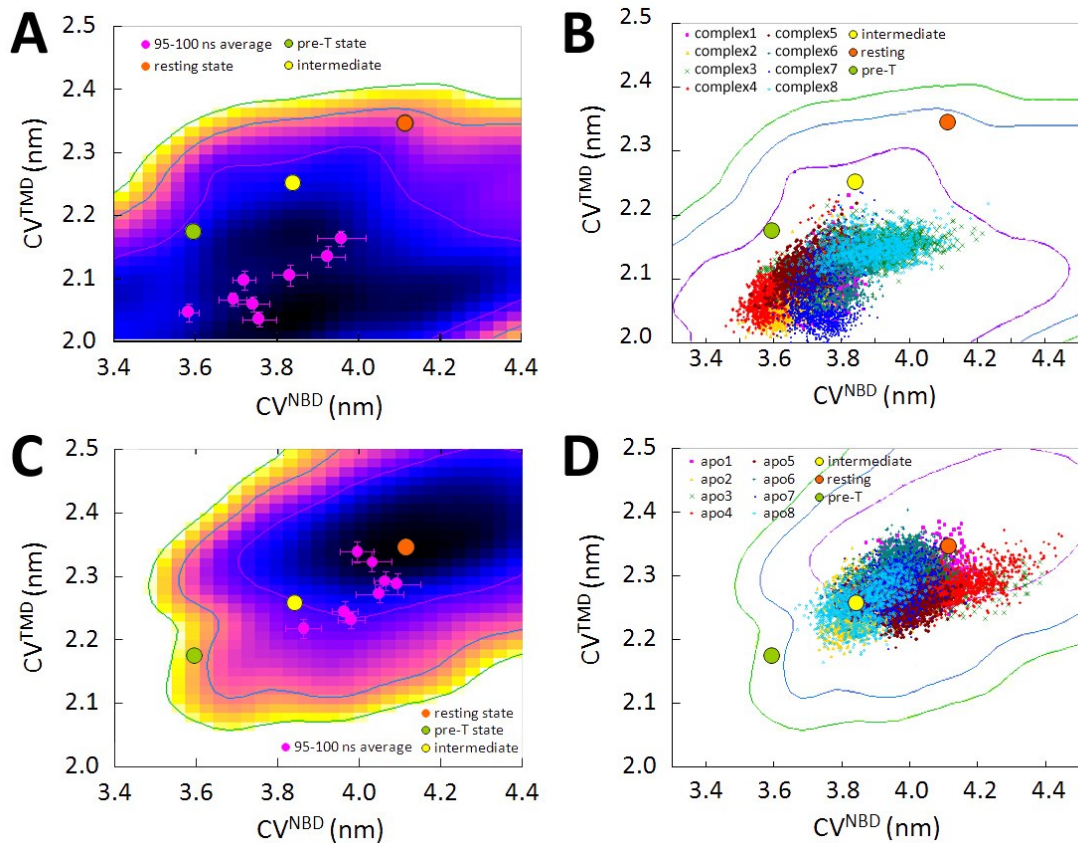

**Figure S6.** (A) Final structures of eight 100-ns **complex** trajectories initiated from an intermediate structure (yellow circle) projected on the 2-D space spanned by  $CV^{NBD}$  and  $CV^{TMD}$ . The final structures are averaged over the last 5 ns and the standard deviations of the CVs are denoted by error bars. The projections of the resting and pre-T states on the 2-D space are denoted by orange and green circles, respectively. (B) Snapshots of the 100-ns **complex** trajectories projected on the 2-D space. (C) Final structures of eight 100-ns **apo** trajectories projected on the 2-D space. (D) Snapshots of the 100-ns **apo** trajectories projected on the 2-D space. The 2-D energy landscape and/or the contour lines of the landscape denoting 10, 20, 30 kcal/mol obtained from metadynamics simulations are also depicted.
